# Supplementary material for: Unraveling the site-specific energy transfer driven tunable emission characteristics of Eu3+ & Tb3+ co-doped Ca10(PO4)6F2 phosphors
Source: Royal Society of Chemistry journal article supplement (doi:10.1039/d1ra04941k), 2021-01-01
Supplement: d1ra04941k1.pdf [file d1ra04941k1.pdf]

## Unraveling site-specific energy transfer driven tunable emission characteristics of Eu<sup>3+</sup> & Tb<sup>3+</sup> co-doped Ca<sub>10</sub>(PO<sub>4</sub>)<sub>6</sub>F<sub>2</sub> phosphors

Nimai Pathak<sup>a\*</sup>, Bhagyalaxmi Chundawat<sup>b</sup>, Pratik Das<sup>c</sup>, Pampa Modak<sup>d</sup>, and Brindaban Modak<sup>ef</sup>

<sup>a</sup> Radiochemistry Division, Bhabha Atomic Research Centre, Mumbai, 400085, India

<sup>b</sup> Ex MSc student from KJ Somaiya College of Science & Commerce, Vidyavihar, Mumbai

<sup>c</sup> Fuel Chemistry Division, Bhabha Atomic Research Centre, Mumbai, 400085, India <sup>e</sup>RSD,

<sup>d</sup> Atomic Energy Regulatory Board, Anushaktinagar Mumbai-400094, India

<sup>e</sup>Theoretical Chemistry Section, Bhabha Atomic Research Centre, Mumbai-400 085, India

<sup>f</sup>Homi Bhabha National Institute (HBNI), Mumbai

\*Email: [nmpathak4@gmail.com](mailto:nmpathak4@gmail.com), [nimai@barc.gov.in](mailto:nimai@barc.gov.in)

Telephone- +91-22-25590715

Fax- +91-22-25405151

### Instrumentation

#### X-Ray diffraction (XRD)

We have used Proto powder X-ray diffractometer (Canada) to characterise the prepared compounds. CuK $\alpha$  ( $\lambda$ = 1.5406 and 1.5444 Å) monochromatic radiation has been used as X-ray radiation source. All the diffraction patterns were collected within the 2 $\theta$  range of 20-90 with a step width of 0.02 and scan rate of 5s.

#### Fourier-transform infrared spectroscopy (FTIR) study

A Bruker Platinum ATR FTIR spectrometer in the spectral range 2000-500 cm<sup>-1</sup> has been used to record all the FTIR spectra.

#### Photoluminescence study (PL)

An Edinburgh CD-920 spectrometer (from Edinburgh Analytical Instruments, UK )with M 300 monochromator has been used to record the PL emission spectra of all the samples. The data acquisition and analysis were carried with the help of F-900 software provided by Edinburgh Analytical Instruments. A Xenon flash with a frequency of 100 Hz has been used as excitation source. For each of the emission and excitation spectrum a minimum of five scans has been taken to minimize the peak intensity fluctuation and to maximize S/N ratio. To perform the lifetime study for the compounds we have used the well established Time-correlated single-photon counting (TCSPC) technique.

**X-ray fluorescence (XRF):** An ATI-micro XRF instrument is used to record the XRF spectrum.

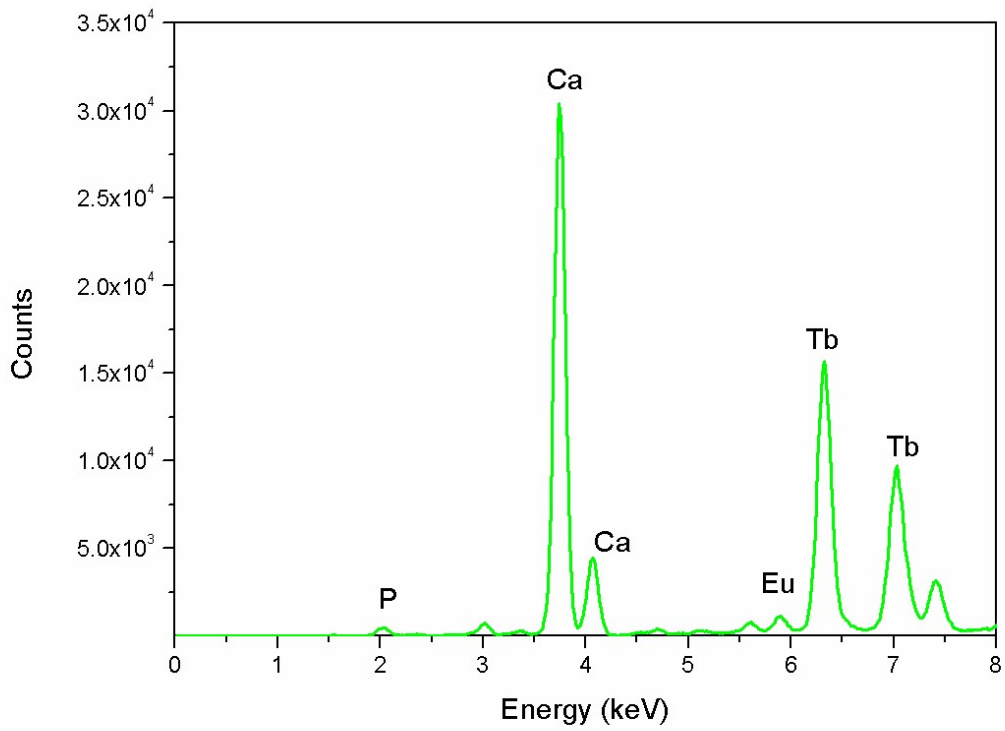

**Figure S1:** XRF spectra of  $\text{Eu}_{0.1}\text{Tb}_{0.5}:\text{CPF}$

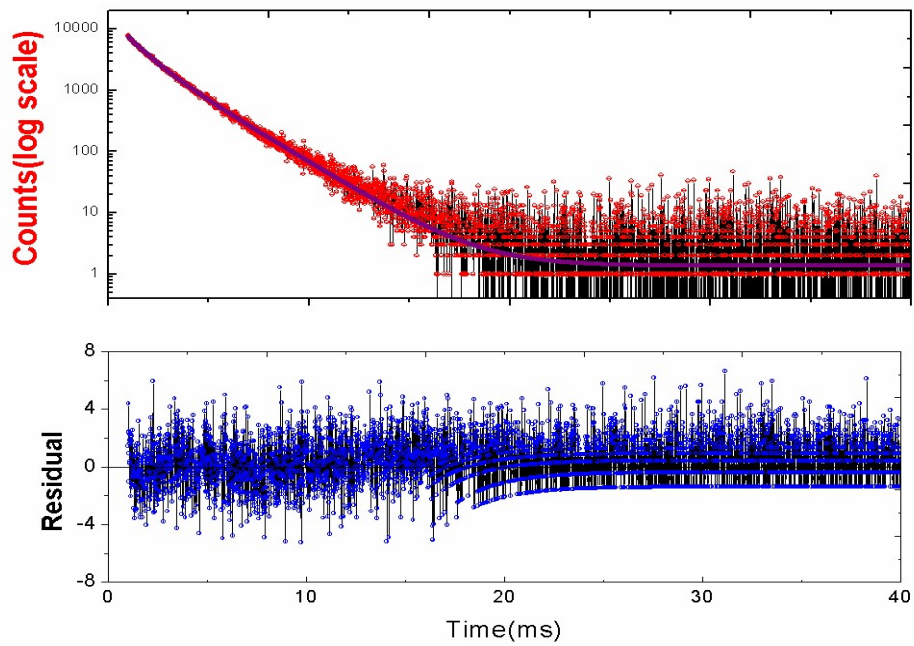

**Figure S2:** Photoluminescence decay profile at  $\lambda_{\text{ex}} = 230$  nm and  $\lambda_{\text{em}} = 547$  nm for  $\text{Eu}_{0.3}\text{-Tb}_{0.5}:\text{CFP}$

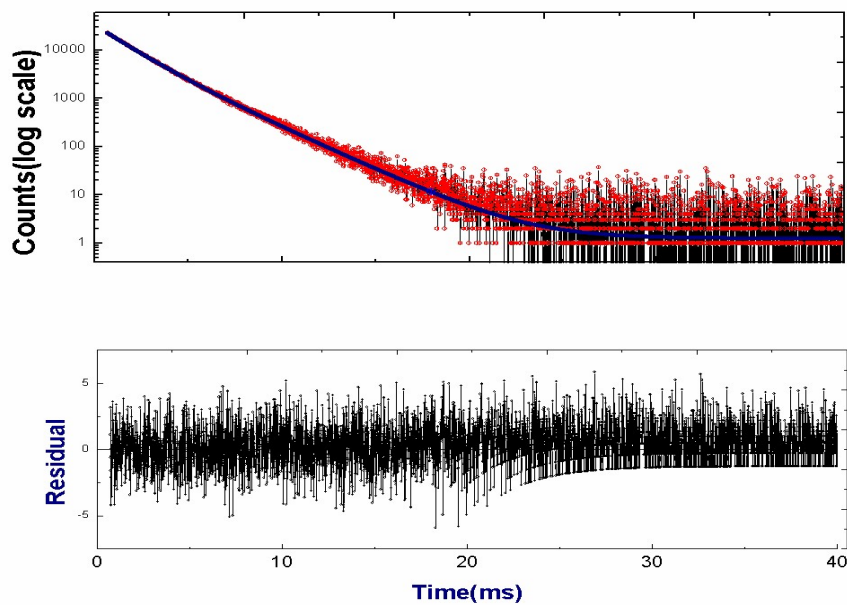

**Figure S3:** Photoluminescence decay profile at  $\lambda_{\text{ex}}=230$  nm and  $\lambda_{\text{em}}=620$  nm for Eu<sub>0.3</sub>-Tb<sub>0.5</sub>:CFP

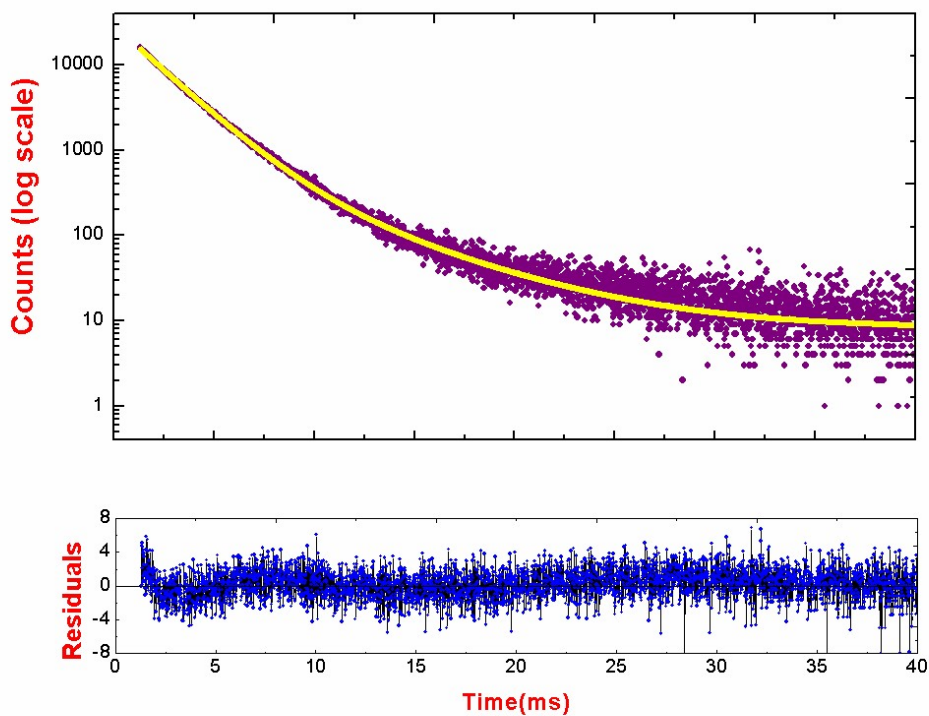

**Figure S4:** Photoluminescence decay profile at  $\lambda_{\text{ex}}=230$  nm and  $\lambda_{\text{em}}=547$  nm for Eu<sub>0.5</sub>-Tb<sub>0.3</sub>:CFP

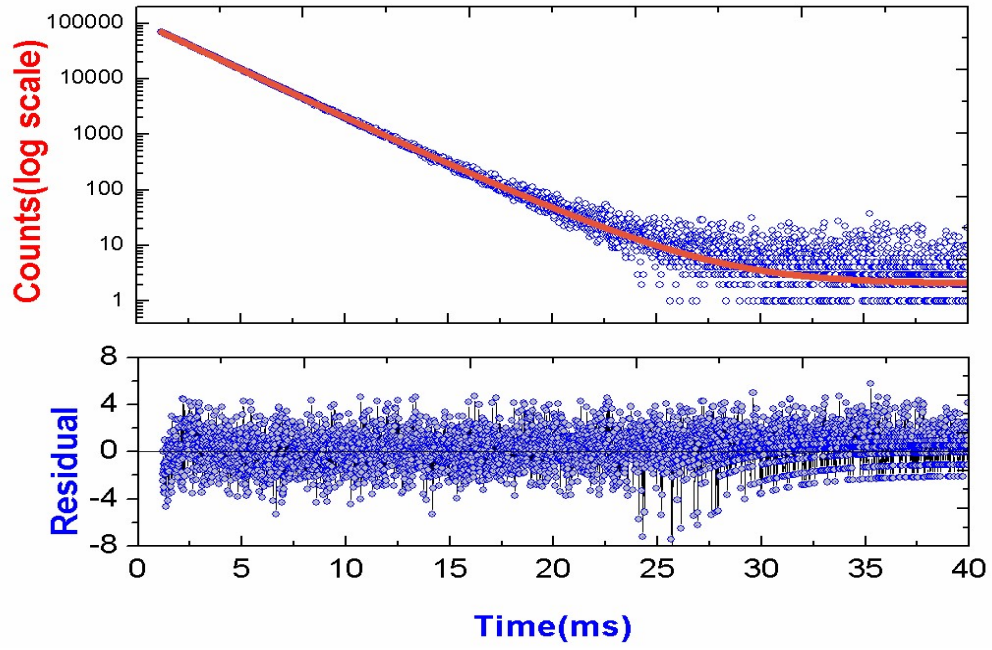

**Figure S5:** Photoluminescence decay profile at  $\lambda_{\text{ex}}=230$  nm and  $\lambda_{\text{em}}=620$  nm for  $\text{Eu}_{0.5}\text{-Tb}_{0.3}$ : CFP
